# Supplementary material
Source: PubMed Central journal article supplement (PMC3100613)
Supplement: supp_en.2010-1232_en-10-1232_figs_1-2.pdf [file supp_en.2010-1232_en-10-1232_figs_1-2.pdf]

**Supplemental Fig. 1**

Western blot analysis of SF-1, Ubc9, and PIAS1 in transfected H295R cells.

H295R cell in 6-well dishes were transfected using Lipofectamine 2000 with 4 $\mu$ g of total DNA, including 2 $\mu$ g of pRc/RSV-SF-1 or empty vector (pRc/RSV), and 1 or 2 $\mu$ g of pcDNA3.1/His-Ubc9 (or C93S mutants) or pcDNA3.1/His-PIAS1 (or C351S mutants) or empty vector (pcDNA3.1/His). 48h after transfection, whole cell extracts were assayed for Western blot analysis to confirm the protein expressions.

**Supplemental Fig. 2**

Treatment with dexamethasone does not alter levels of expression of SF-1, Ubc9, and PIAS1 proteins in H295R cells.

Western blotting showed that treatment of H295R cells with increasing concentrations of dexamethasone for 12 hours did not alter endogenous protein levels of SF-1, Ubc9, and PIAS1.
